# Supplementary material
Source: PubMed Central journal article supplement (PMC5830690)
Supplement: nn7b08357_si_001.pdf [file nn7b08357_si_001.pdf]

# Supporting Information

## Role of Acid-Base Equilibria in the Size, Shape and Phase Control of Cesium Lead Bromide Nanocrystals

Guilherme Almeida<sup>†,‡</sup>, Luca Goldoni<sup>‡,Δ</sup>, Quinten Akkerman<sup>†,‡</sup>, Zhiya Dang<sup>†</sup>, Ali Hossain Khan<sup>†</sup>, Sergio Marras<sup>°</sup>, Iwan Moreels<sup>†,¶</sup> and Liberato Manna<sup>†\*</sup>

<sup>†</sup>Department of Nanochemistry, <sup>‡</sup>D3-PharmaChemistry Line, <sup>Δ</sup>Analytical Chemistry Facility and <sup>°</sup>Materials Characterization Facility, Istituto Italiano di Tecnologia, Via Morego 30, 16163 Genova, Italy

<sup>‡</sup>Dipartimento di Chimica e Chimica Industriale, Università degli Studi di Genova, Via Dodecaneso, 31, 16146, Genova, Italy

<sup>¶</sup>Department of Chemistry, Ghent University, Krijgslaan 281-S3, 9000 Gent, Belgium

### Table of Contents

|                                                                                                                               |           |
|-------------------------------------------------------------------------------------------------------------------------------|-----------|
| <b>S1. Experimental details</b> .....                                                                                         | <b>2</b>  |
| <b>S2. Re-precipitation of PbBr<sub>2</sub></b> .....                                                                         | <b>3</b>  |
| <b>S3. Synthesis of nanocubes over 100 nm</b> .....                                                                           | <b>4</b>  |
| <b>S4. Effect of [OA] on NANOCRYSTAL size and shape</b> .....                                                                 | <b>5</b>  |
| <b>S5. Effect of [OA] and reaction time on NANOCRYSTAL size and shape</b> .....                                               | <b>6</b>  |
| <b>S6. HRTEM characterization of CsPbBr<sub>3</sub> nanoplatelets</b> .....                                                   | <b>7</b>  |
| <b>S7. NMR characterization of a solution containing oleylamine (0.5M) and oleic acid (1M) in toluene-d<sub>8</sub></b> ..... | <b>8</b>  |
| <b>S8. Nanoplatelets synthesized at 90 and 190 °C</b> .....                                                                   | <b>9</b>  |
| <b>S9. Formation of nanoplatelets in presence of Bronsted acids</b> .....                                                     | <b>11</b> |
| <b>S10. CsBr nanocrystals</b> .....                                                                                           | <b>12</b> |
| <b>S11. Nanowire formation upon treating CsPbBr<sub>3</sub> quantum dots with polar solvents</b> .....                        | <b>13</b> |
| <b>S12. Extension of the work to other halide systems</b> .....                                                               | <b>14</b> |

## S1. Experimental details and further photo-physical characterization of nanoplatelets

**Table S1.** Synthesis conditions used to prepare CsPbBr<sub>3</sub> nanoplatelets (NPLs) and (RNH<sub>3</sub>)<sub>2</sub>PbBr<sub>4</sub> nanosheets (NSs, 1 ML), and their photoluminescence (PL) properties (T: synthesis temperature; [Cs]<sub>i</sub>: concentration of Cs<sup>+</sup> in injection solution; hν: photon energy at PL maximum; FWHM: PL full width at half maximum; φ: PL quantum yield; τ: PL lifetime; “-“: data not collected). \*formed during cooldown.

| NPL / NS<br>thickness<br>nm | Reaction conditions |                |              |                           |          | Photoluminescence (PL) |               |          |           |
|-----------------------------|---------------------|----------------|--------------|---------------------------|----------|------------------------|---------------|----------|-----------|
|                             | T<br>(°C)           | [OIAm]<br>(mM) | [OA]<br>(mM) | [Cs] <sub>i</sub><br>(mM) | t<br>min | hν<br>(eV)             | FWHM<br>(meV) | φ<br>(%) | τ<br>(ns) |
| 2.4                         | 90                  | 250            | 500          | 300                       | 5        |                        |               |          |           |
| 1.8                         | 90                  | 250            | 500          | 23                        | 5        |                        |               |          |           |
| 2.4                         | 140                 | 250            | 500          | 150                       | 5        | 2.67                   | 78            | 20       | 6.2       |
| 1.8                         | 140                 | 250            | 500          | 23                        | 5        | 2.84                   | 81            | -        | -         |
| 1 ML                        | 140                 | 250            | 500          | 0                         | *        | 3.08                   | 130           | 3        | 2.6       |
| 2.4                         | 190                 | 250            | 500          | 23                        | 5        |                        |               |          |           |
| 1.8                         | 190                 | 250            | 500          | 15                        | 1        |                        |               |          |           |

## S2. Re-precipitation of $\text{PbBr}_2$

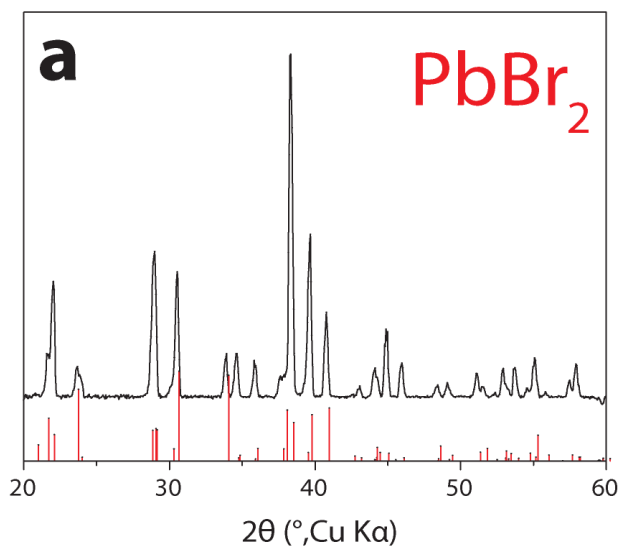

**Figure S1** . XRD pattern of  $\text{PbBr}_2$  precipitated out of an oleylamine, oleic acid, 1-octadecene mixture at ca. 195-200  $^\circ\text{C}$ .

### S3. Synthesis of nanocubes over 100 nm

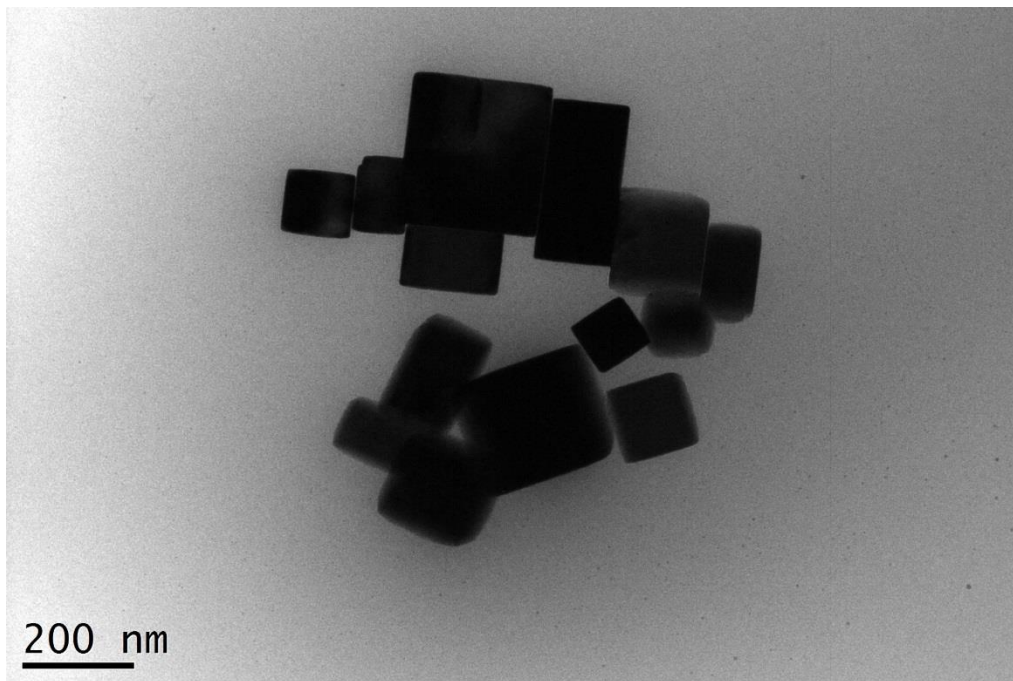

**Figure S2** . CsPbBr<sub>3</sub> nanocubes over 100 nm in size, synthesized at 240 °C with [OlAm] = 1.5 M, [OA] = 1.5 M and grown for 5 minutes.

## S4. Effect of [OA] on Nanocrystal size and shape

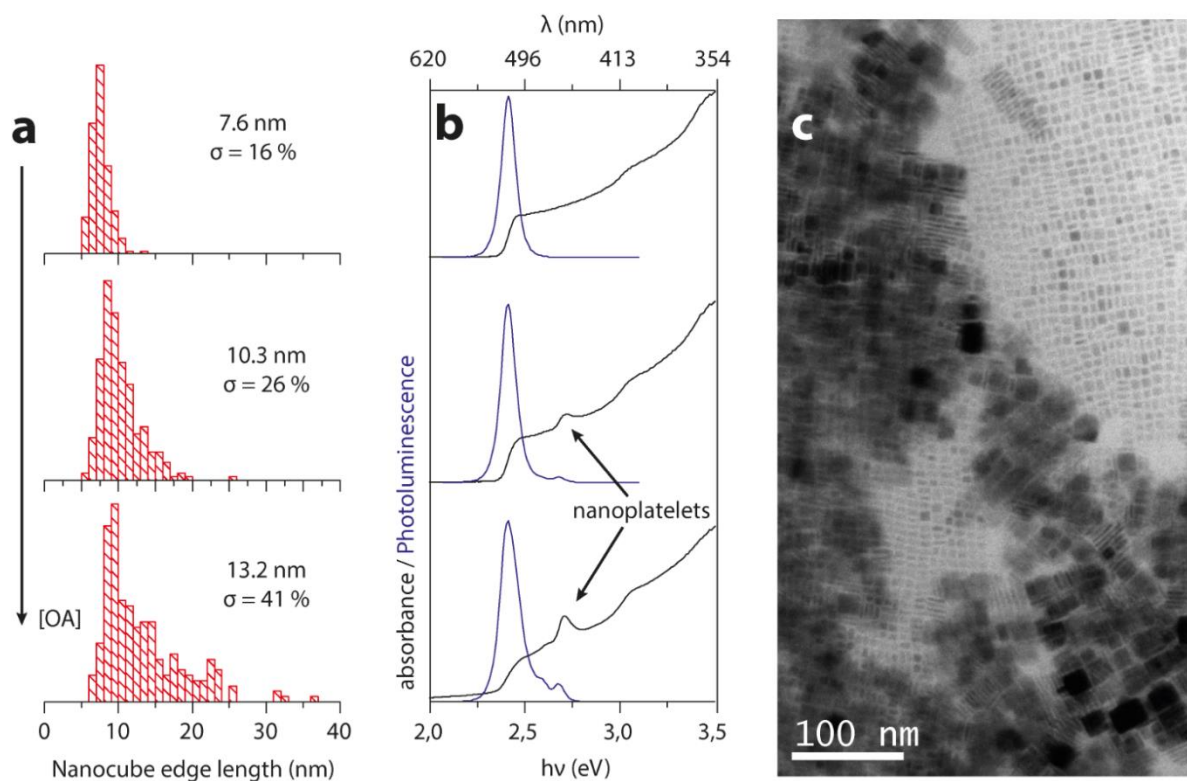

**Figure S3.** Effect of oleic acid concentration on the size and shape of CsPbBr<sub>3</sub> nanocrystals synthesized at 190 °C. (a) Size-distribution histograms and (b) optical spectra of nanocrystals synthesized with increasing concentrations of oleic acid ([OA] = 0.25, 0.50 and 1.00 M, [OlaM] = 0.25 M). (c) TEM image of nanocrystals synthesized with [OA] = 1.00M and [OlaM] = 0.25M. Note the presence of nanoplatforms.

## S5. Effect of [OA] and reaction time on Nanocrystal size and shape

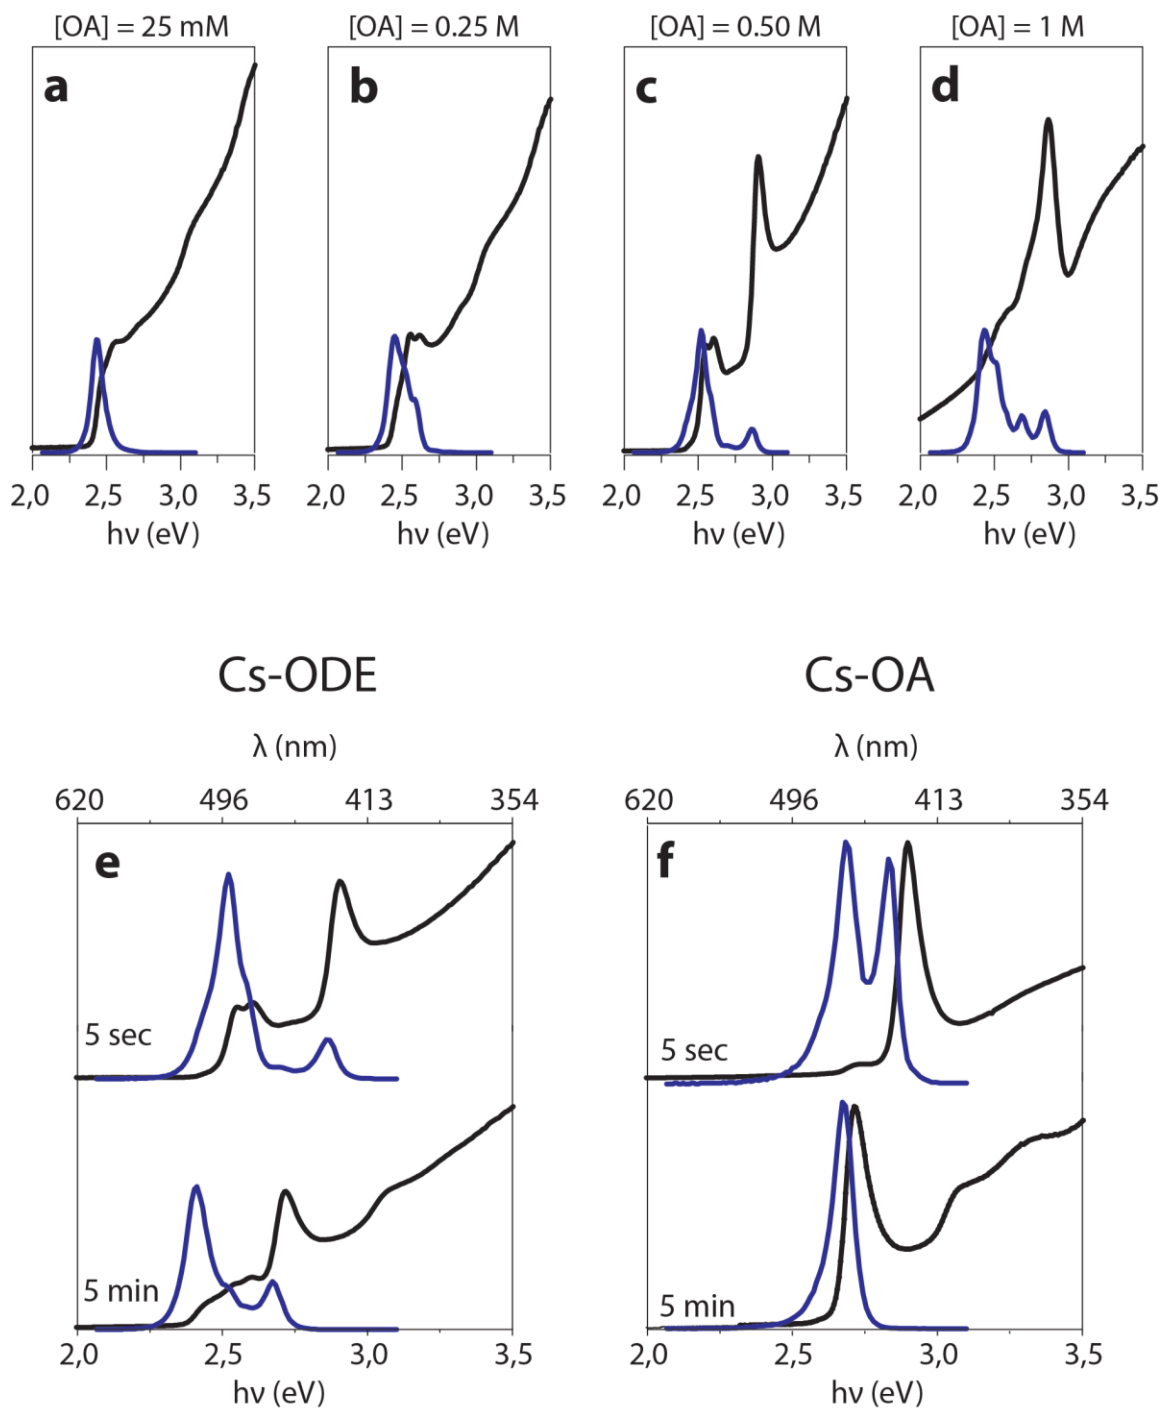

**Figure S4.** (a-d) absorption (black) and photoluminescence (blue) spectra of CsPbBr<sub>3</sub> nanocrystals synthesized for 5 s at 140 °C with increasing amounts of oleic acid ([OIAm]=0.25M) using Cs-oleate in ODE. (e-f) Absorption (black) and photoluminescence (blue) spectra of CsPbBr<sub>3</sub> nanocrystals synthesized at 140 °C for 5 secs and 5 minutes using Cs-ODE and Cs-OA, respectively, as a Cs-precursor.

## S6. HRTEM characterization of CsPbBr<sub>3</sub> nanoplatelets

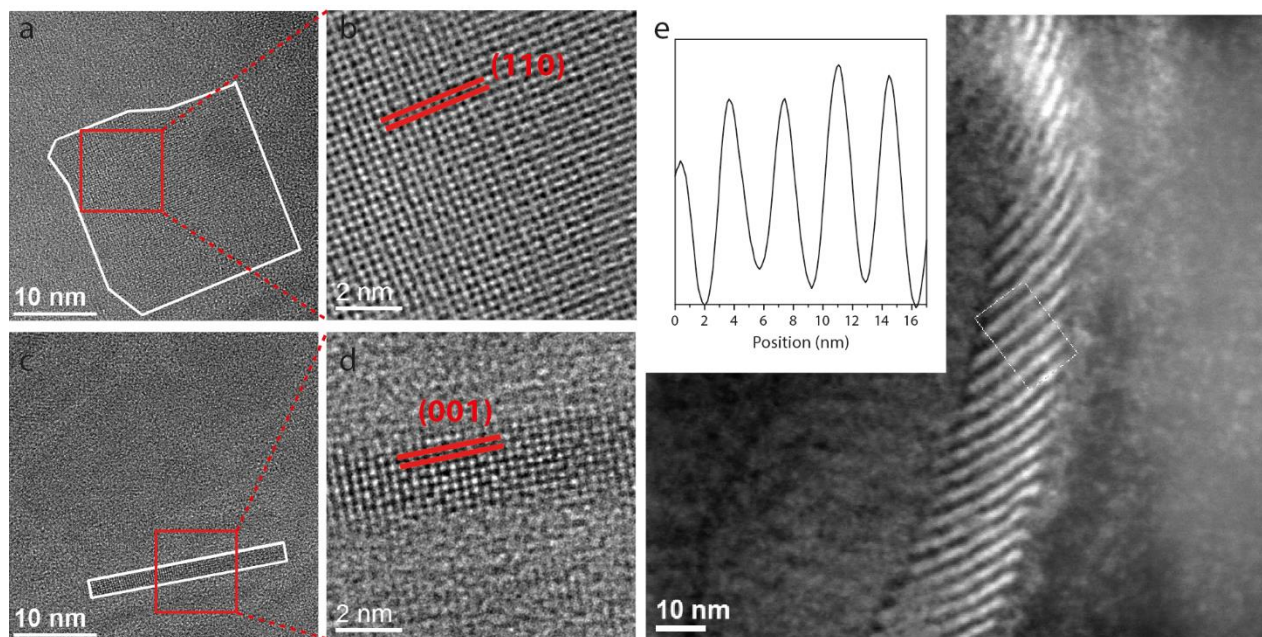

**Figure S5.** (a-b) top- and (c-d) side-view STEM and HRTEM images of 2.4 nm thick CsPbBr<sub>3</sub> nanoplatelets, respectively. (e) side-view HAADF image of stacks of 1.8 nm thick CsPbBr<sub>3</sub> nanoplatelets (inset: contrast line-scan of the region is delimited in the image)

## S7. NMR characterization of a solution containing oleylamine (0.5M) and oleic acid (1M) in toluene-d<sub>8</sub>

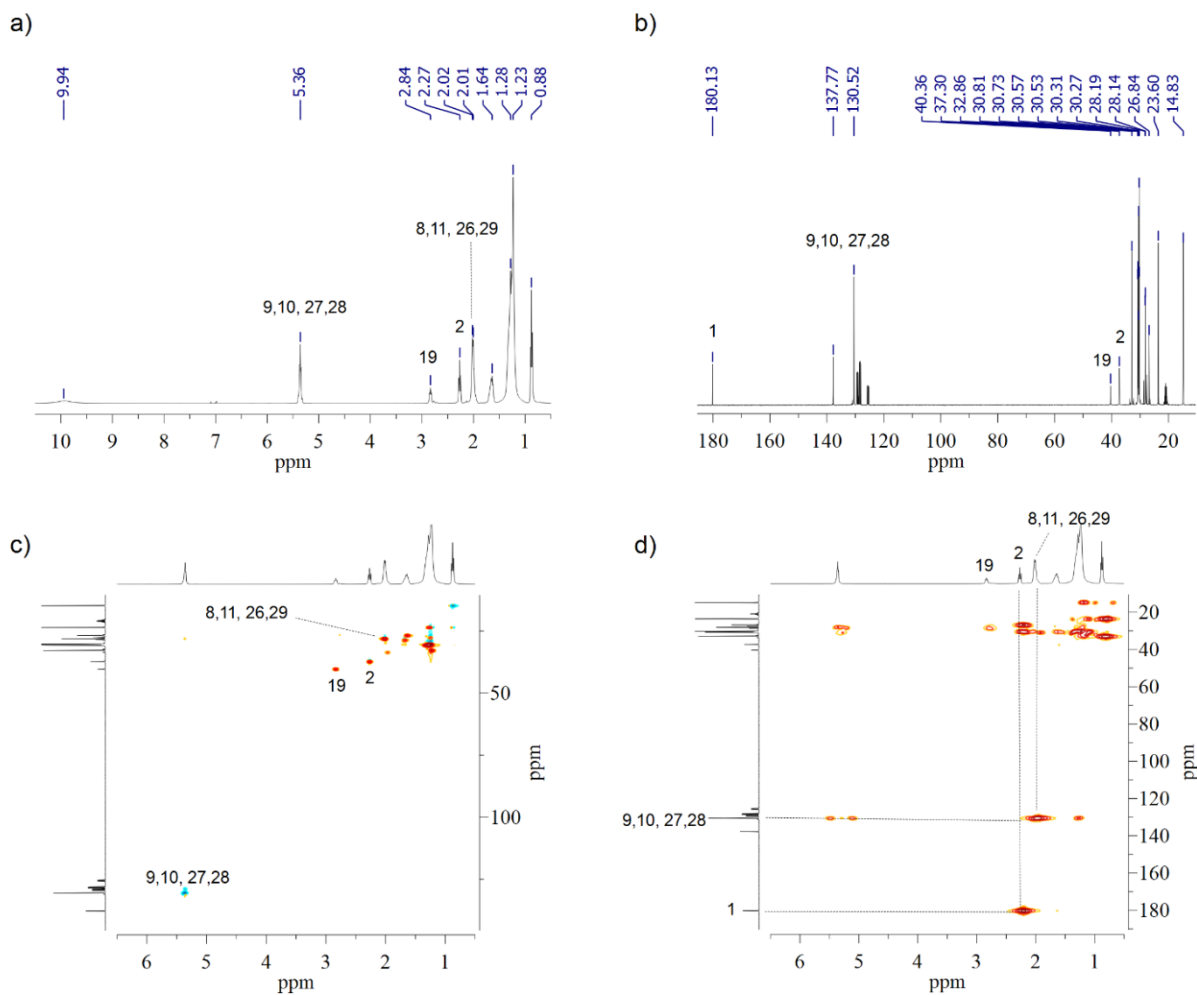

**Figure S6.1** a) <sup>1</sup>H, b) <sup>13</sup>C, c) edited <sup>1</sup>H-<sup>13</sup>C-HSQC and d) <sup>1</sup>H-<sup>13</sup>C-HMBC NMR spectra of an OlAm : OA solution in toluene-d<sub>8</sub>. Diagnostic signals have been embedded in the figures.

**Table S3** Assignment of resonances

| Assignment                         | <sup>1</sup> H | <i>J</i> (Hz) |             | <sup>13</sup> C |
|------------------------------------|----------------|---------------|-------------|-----------------|
| -                                  | 9.94           | -             | <i>br s</i> | -               |
| <b>9,10, 27 and 28</b>             | 5.36           | -             | <i>m</i>    | 130.5           |
| <b>19</b>                          | 2.84           | -             | <i>ps t</i> | 40.4            |
| <b>2</b>                           | 2.27           | 7.65          | <i>t</i>    | 37.3            |
| <b>8, 11, 26 and 29</b>            | 2.11-2.91      | -             | <i>m</i>    | 28.2 and 28.1   |
| <b>20</b>                          | 1.67           | -             | <i>m</i>    | 28.6            |
| <b>3</b>                           | 1.64           | -             | <i>m</i>    | 26.8            |
| <b>4-7,12-15,<br/>21-25, 30-33</b> | 1.45-1.05      | -             | <i>m</i>    | 30.8-20.3       |
| <b>17 and 35</b>                   | 1.26           | -             | <i>m</i>    | 23.6            |
| <b>16 and 34</b>                   | 1.23           | -             | <i>m</i>    | 32.9            |
| <b>18 and 36</b>                   | 0.88           | 6.9           | <i>t</i>    | 14.8            |
| <b>1</b>                           | -              | -             | CO          | 180.1           |

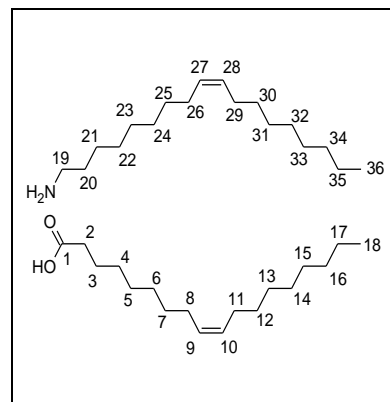



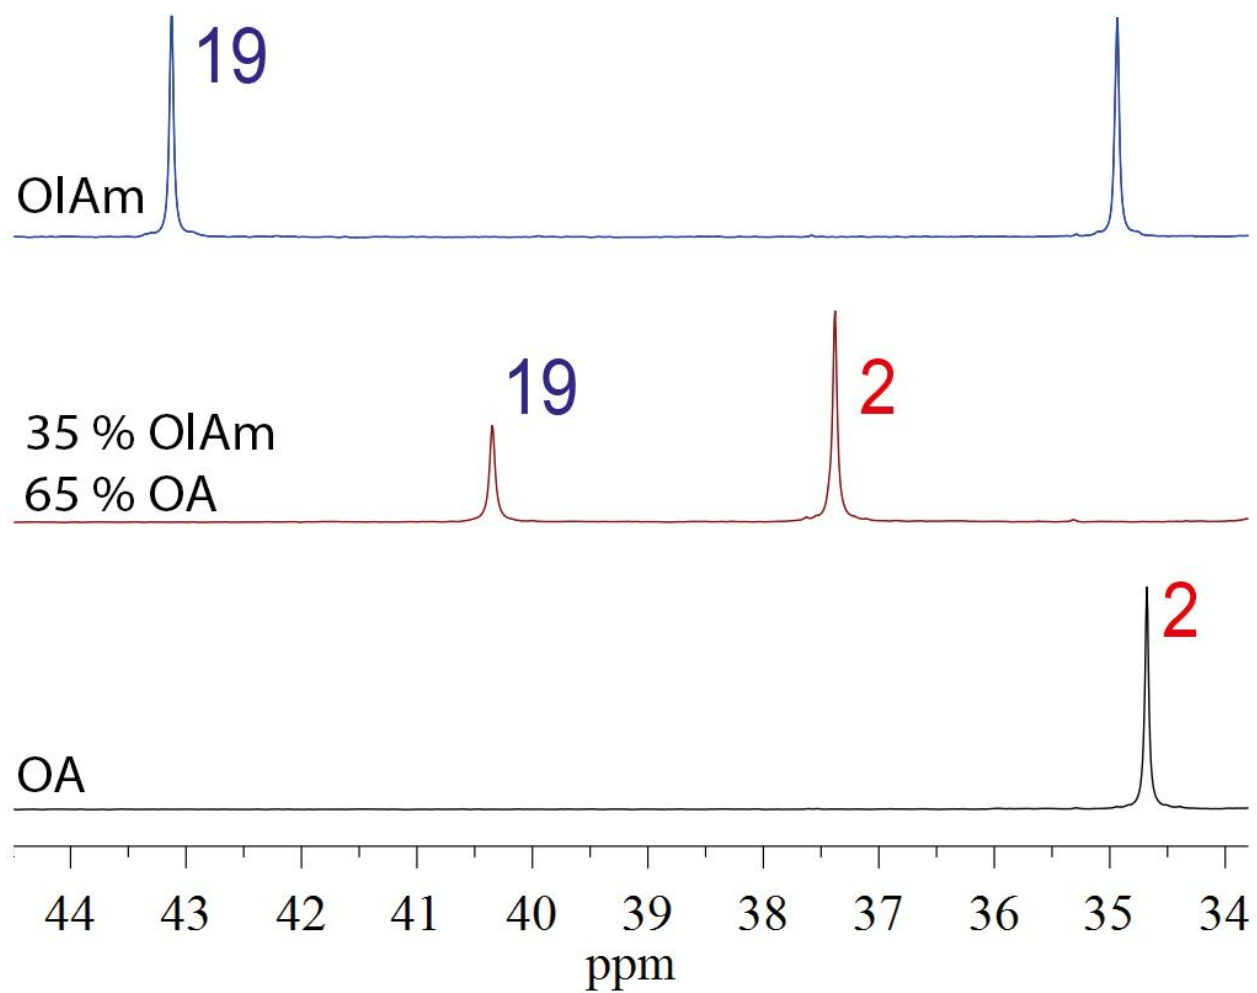

**Figure S6.2**  $^{13}\text{C}$ -NMR spectra of oleylamine and oleic acid solutions in toluene- $d_8$

## S8. Nanoplatelets synthesized at 90 and 190 °C

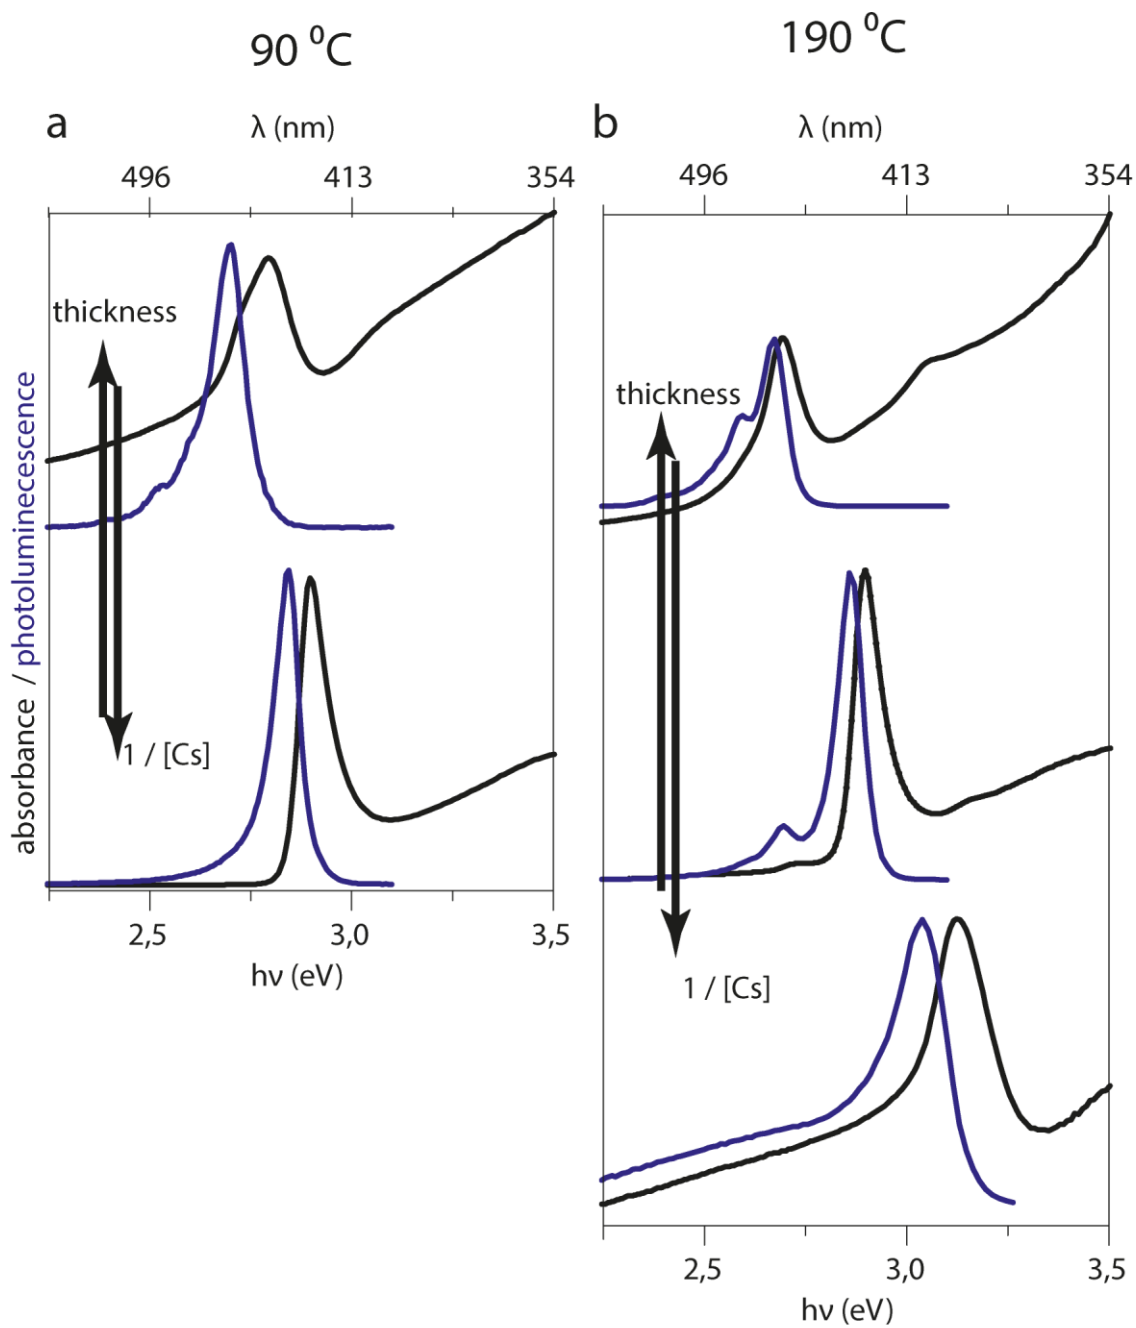

**Figure S7.** Absorbance and photoluminescence spectra of nanoplatelets synthesized at (a) 90 and (b) 190 °C.

## S9. Formation of nanoplatelets in presence of Bronsted acids

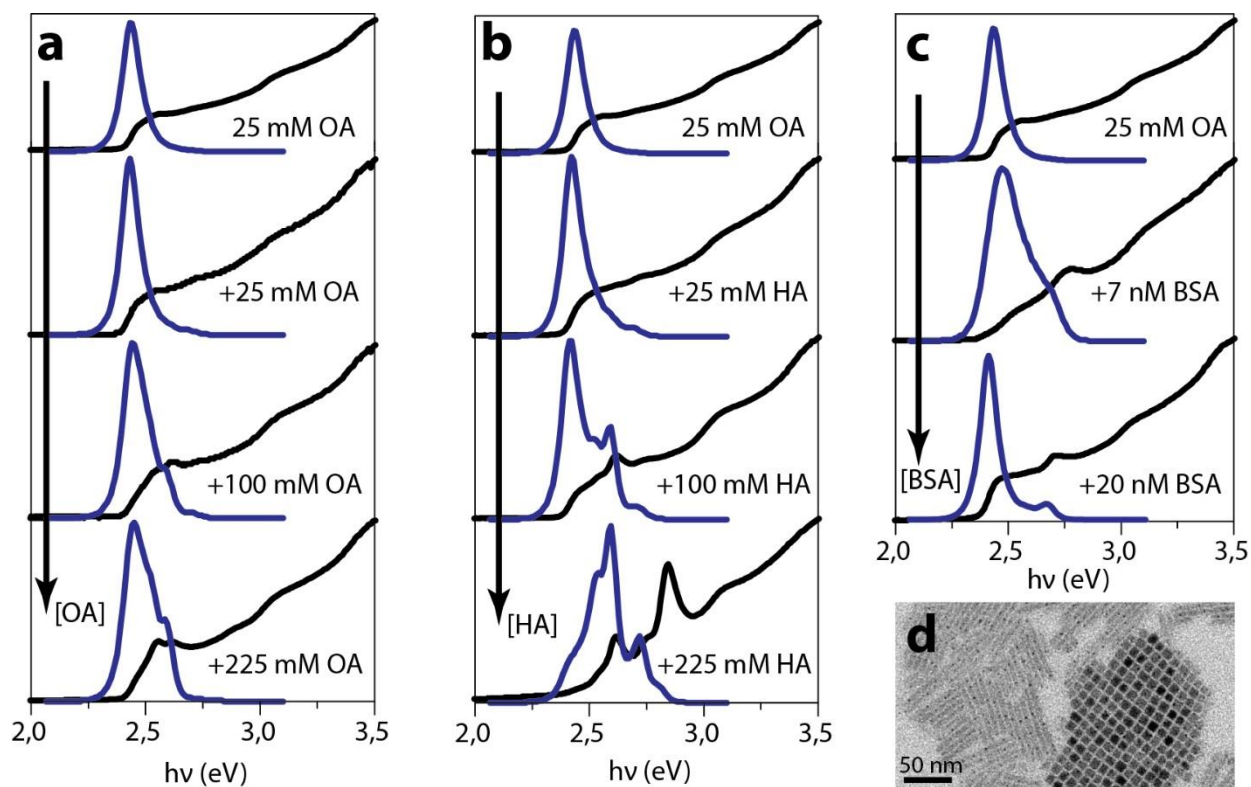

**Figure S8.** Absorbance (black) and photoluminescence (blue) spectra of nanocrystals synthesized with increasing amounts of (a) oleic acid (OA), (b) hexanoic acid (HA) and (c) benzylsulfonic acid (BSA). Increasing the amount of acid causes extra peaks appear in the absorption and photoluminescence spectra of the nanocrystal product, which is attributed to the presence of nanoplatelets (deduced from the peak position and the narrow width of these peaks at high intensities, which is to be expected of a two-dimensional semiconductive system). (d) TEM image of nanocrystals (cubes + stripes) obtained in the presence of BSA.

## S10. CsBr nanocrystals

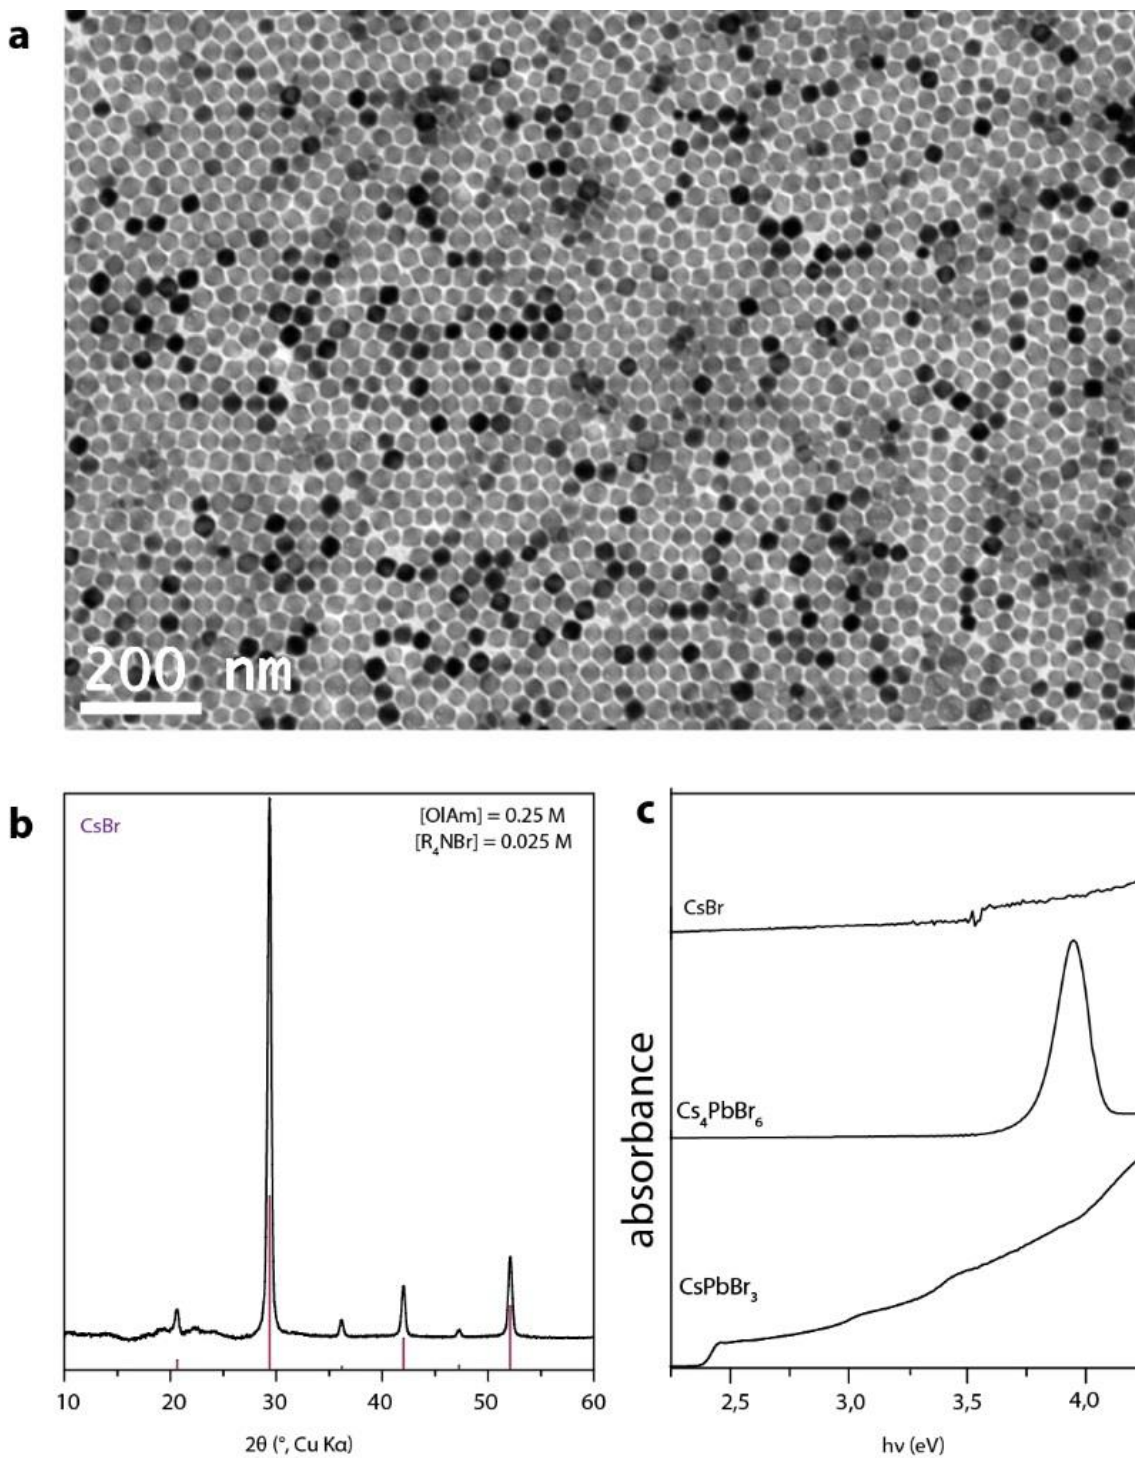

**Figure S9.** Monodisperse CsBr nanocrystals could be synthesized by reacting a tetralkylammonium bromide (DDAB) with Cs-oleate at 150 °C for 5 minutes in the presence of oleylamine. (a) TEM image and (b) XRD pattern (ICSD 98-005-3848) of CsBr nanocrystals. (c) absorbance spectra of CsBr, Cs<sub>4</sub>PbBr<sub>6</sub> and CsPbBr<sub>3</sub> nanocrystals.

## S11. Nanowire formation upon treating CsPbBr<sub>3</sub> nanocrystals (< 4.0 nm) with polar solvents

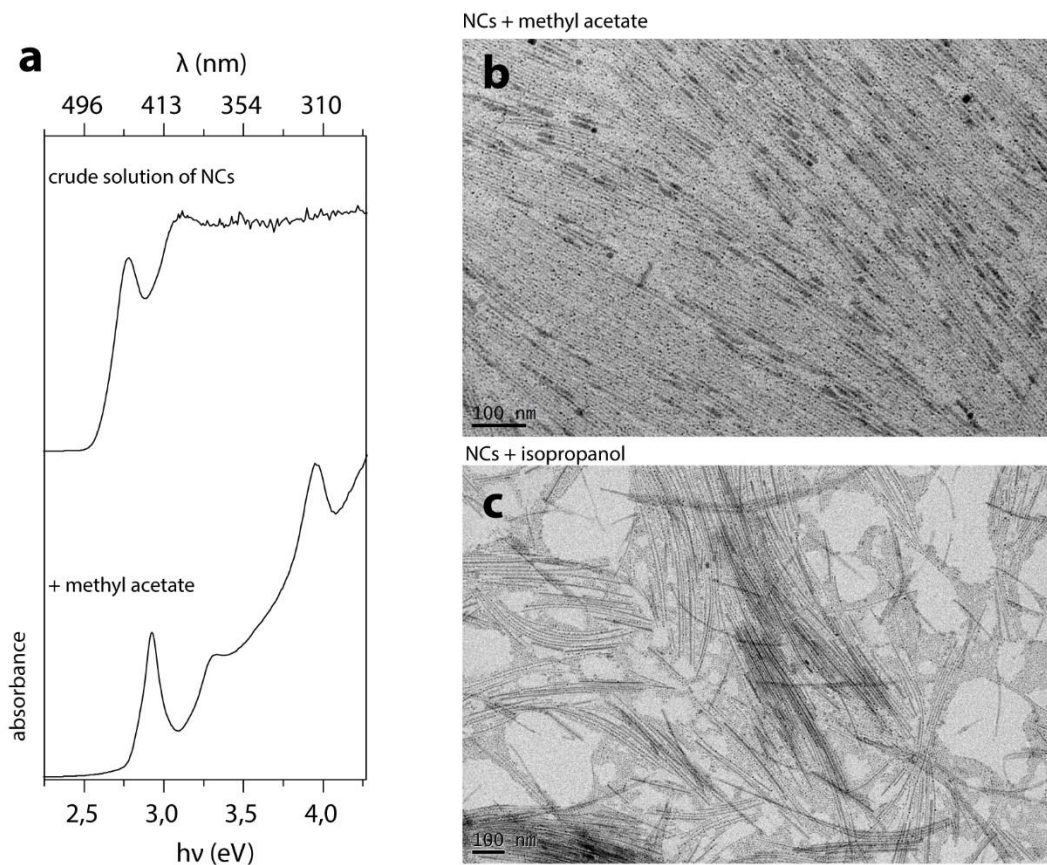

**Figure S10.** Effect of anti-solvents on CsPbBr<sub>3</sub> nanocrystals synthesized at 100 °C ([OIAm] = 0.25 M, [OA] = 0.025 M). (a) Absorbance spectra of the crude solution containing CsPbBr<sub>3</sub> nanocrystals (< 4.0 nm) and of the nanocrystals precipitated by the addition of methyl acetate. TEM images of nanocrystals precipitated with (b) methyl acetate and (c) isopropanol show the presence of a large quantity of nanowires.

## S12. Extension of the work to other halide systems

**Methods:** The syntheses of  $\text{CsPbX}_3$  nanocubes,  $\text{Cs}_4\text{PbX}_6$  nanocrystals and  $[\text{RNH}_3]\text{PbX}_4$  nanosheets ( $X=\text{Cl}, \text{I}$ ) were conducted in the same way as reported for the bromides in the main text. All the materials were synthesized in 6.0 mL solutions with  $[\text{PbX}_2] = 33 \text{ mM}$ .  $\text{CsPbX}_3$  NCs were synthesized at  $165 \text{ }^\circ\text{C}$  with  $[\text{OIAm}] = [\text{OA}] = 0.25 \text{ M}$ .  $\text{Cs}_4\text{PbX}_6$  NCs were synthesized at  $165 \text{ }^\circ\text{C}$  with  $[\text{OIAm}] = [\text{OA}] = 1.0 \text{ M}$  for  $X = \text{I}$  and  $1.5 \text{ M}$  for  $X = \text{Cl}$ .  $(\text{RNH}_3)_2\text{PbX}_4$  nanosheets were obtained by adding oleic acid to a solution of  $\text{PbX}_2$  heated at  $100 \text{ }^\circ\text{C}$ . In these latter syntheses,  $[\text{OIAm}] = [\text{OA}]_i = 0.25 \text{ M}$  (with  $[\text{OA}]_i$  denoting the initial concentration of oleic acid).

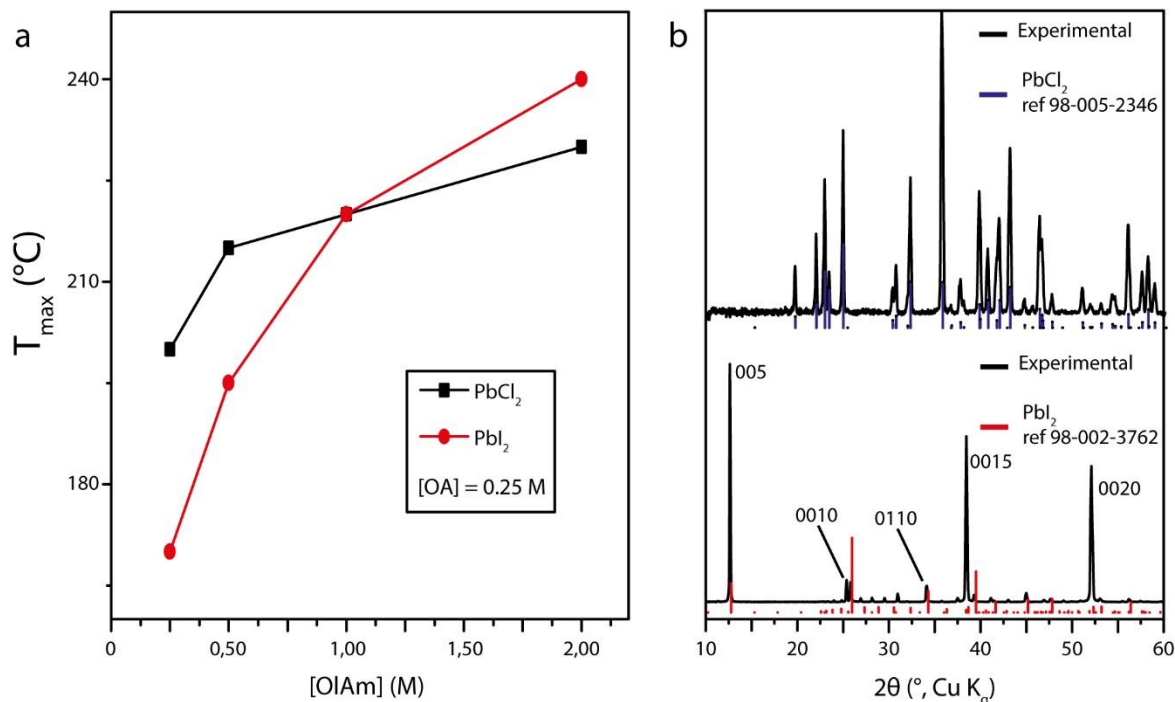

**Figure S11.** (a) Maximum reaction temperature  $T_{\text{max}}$  as a function of ligand concentration; at  $T_{\text{max}}$ ,  $\text{PbX}_2$  ( $X = \text{Cl}, \text{I}$ ) precipitates from the reaction medium (33 mM of  $\text{PbBr}_2$  solution in 1-octadecene with  $[\text{OA}]$  set at a constant 250 mM), as confirmed by (b) x-ray diffraction.

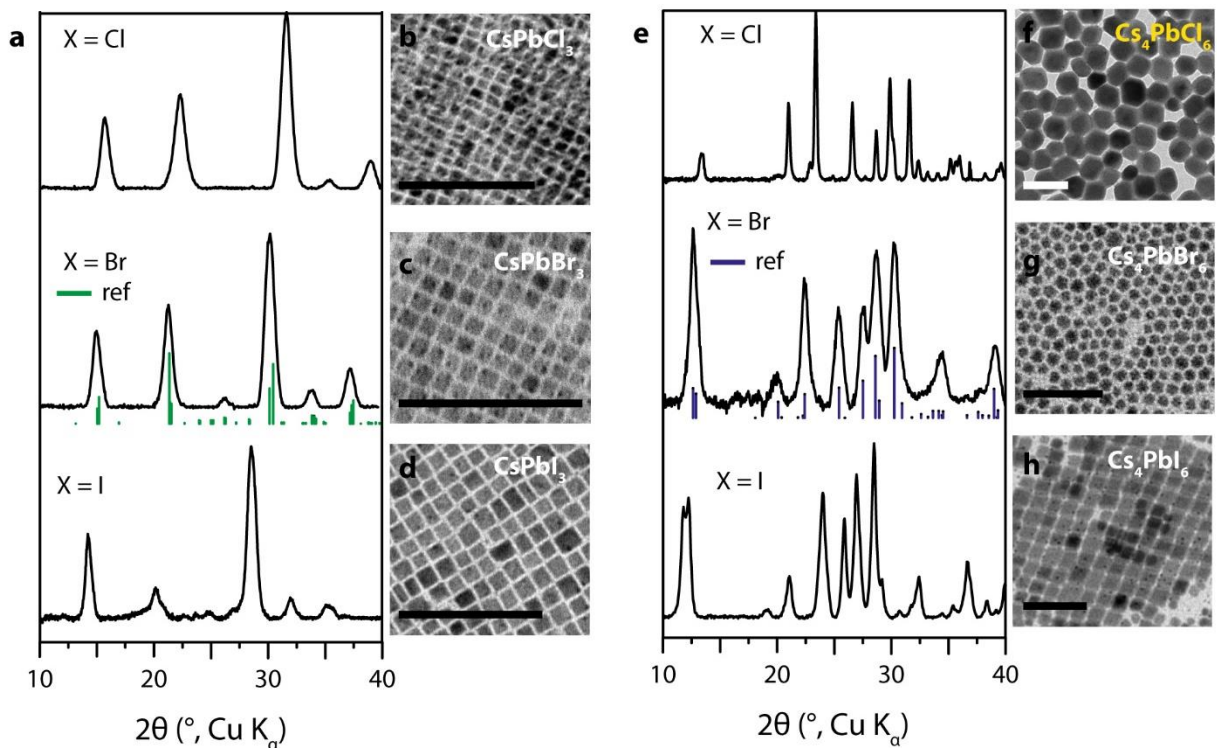

**Figure S12.** (a) x-ray diffraction patterns and (b-d) respective transmission electron microscopy images of CsPbX<sub>3</sub> (X = Cl, Br, I) nanocubes synthesized at 165 °C in the presence of [OlAm] = [OA] = 0.25 M. (e) x-ray diffraction patterns and (f-h) respective transmission electron images of Cs<sub>4</sub>PbX<sub>6</sub> nanocrystals synthesized at 165 °C in the presence of [OlAm] = [OA] = 1.0 M (when X = Br, I) or 1.5 M (when X = Cl). All scale bars represent 100 nm.

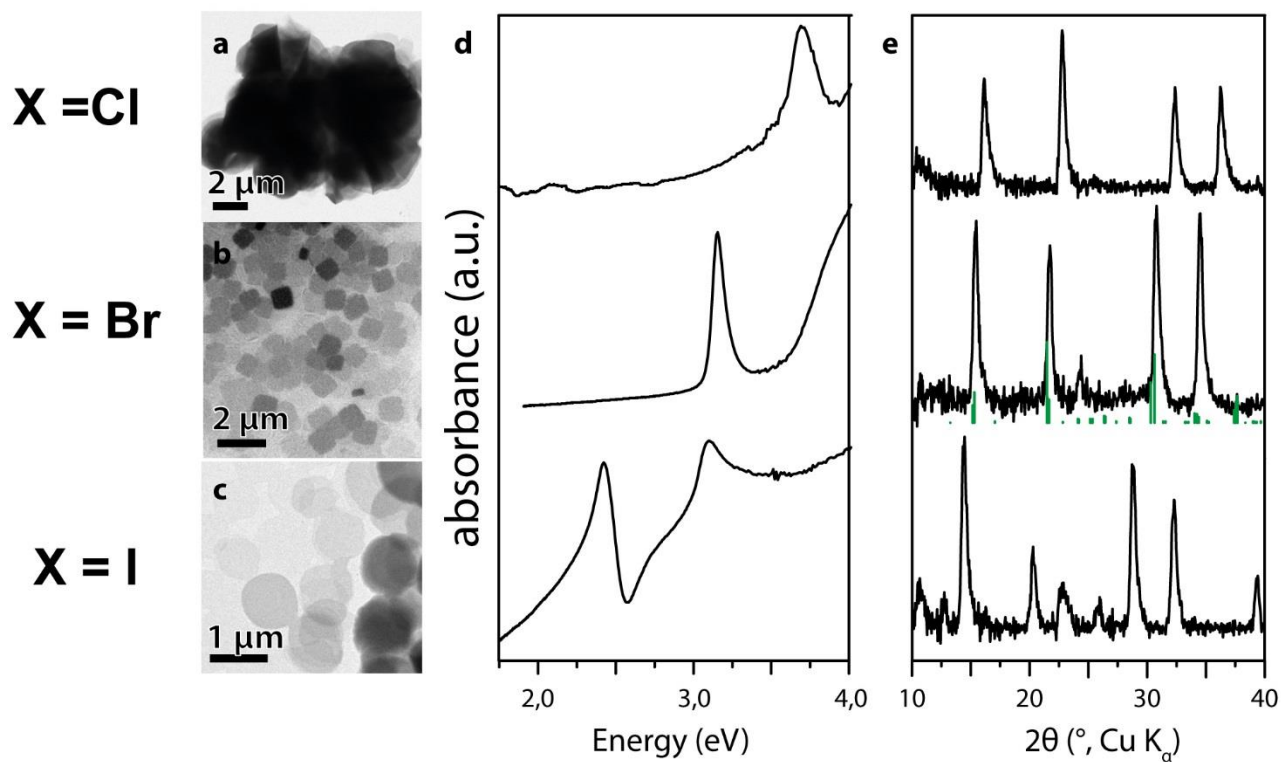

**Figure S13.** (a-c) transmission electron microscopy images, (d) absorbance spectra and (e) x-ray diffraction patterns of  $(\text{RNH}_3)_2\text{PbX}_4$  nanosheets (green lines correspond to the  $\text{CsPbBr}_3$  reference pattern) obtained by adding oleic acid to a hot solution of  $\text{PbX}_2$  ( $[\text{OIAm}] = [\text{OA}]_i = 0.25 \text{ M}$ ,  $[\text{OA}]_i$  denotes the initial concentration of oleic acid).
